# Supplementary material for: Effects of Teneligliptin on HbA1c levels, Continuous Glucose Monitoring-Derived Time in Range and Glycemic Variability in Elderly Patients with T2DM (TEDDY Study)
Source: PubMed Central journal article supplement — Diabetes Metab J. 2021 Jun 16;46(1):81–92. doi: 10.4093/dmj.2021.0016 (PMC8831812; doi:10.4093/dmj.2021.0016), 2021-06-16
Supplement: dmj-2021-0016-suppl5.pdf [file dmj-2021-0016-suppl5.pdf]

**Supplementary Table 5.** Summary of adverse events

|                                  | Teneligliptin<br>(n=35) | Placebo<br>(n=30) |
|----------------------------------|-------------------------|-------------------|
| Number of participants with TEAE | 5 (14.3)                | 7 (23.3)          |
| Serious AEs                      | 1 (2.9)                 | 0                 |
| Discontinuations because of AEs  | 0                       | 0                 |
| Reported AEs                     |                         |                   |
| Hypoglycemia                     | 1 (2.9)                 | 2 (6.7)           |
| Blood creatinine increased       | 0                       | 1 (2.9)           |
| Blood urea increased             | 0                       | 1 (2.9)           |
| Electrocardiogram QT prolonged   | 1 (2.9)                 | 0                 |
| Constipation                     | 1 (2.9)                 | 0                 |
| Pancreatitis chronic             | 1 (2.9)                 | 0                 |
| Conjunctivitis                   | 1 (2.9)                 | 0                 |
| Cystitis                         | 0                       | 1 (2.9)           |
| Blister                          | 0                       | 1 (2.9)           |
| Pruritus                         | 0                       | 1 (2.9)           |
| Cataract                         | 0                       | 1 (2.9)           |
| Glucosuria                       | 0                       | 1 (2.9)           |
| Myalgia                          | 0                       | 1 (2.9)           |

Values are presented as number (%).

TEAE, treatment-emergent adverse events; AE, adverse event.
